# Supplementary material
Source: publisher site journal article supplement (https://www.degruyterbrill.com/publication/isbn/9783486710755/downloadAsset/9783486710755_Materialien.pdf)
Supplement: Supplementary file 1 [file 9783486710755_Materialien.pdf]

# Symbolik und Übungsaufgaben zur Vorlesung „Versuchsplanung“ von Dieter Rasch

## Symbolik

Die folgende Symbolik entspricht mit kleineren Änderungen der in

Anhang A von

Rasch, D., Verdooren L.R.; Gowers, J.I. (2007)

Planung und Auswertung von Versuchen und Erhebungen, R.Oldenbourg Verlag München Wien.

bzw.

Rasch, D., Verdooren L.R. ; Gowers, J.I. (2007)

Design and Analysis of Experiments and Surveys, R.Oldenbourg Verlag München Wien.

## Anhang A Symbolik

|                                             |                                                                                                                                          |
|---------------------------------------------|------------------------------------------------------------------------------------------------------------------------------------------|
| $Y_{i.} = y_{i.} = \sum_{j=1}^{n_i} y_{ij}$ | Ein Punkt an der Stelle eines Suffix bezeichnet die Summierung über diesen Suffix. Zusätzlich kann der Buchstabe groß geschrieben werden |
| $p$                                         | Wahrscheinlichkeit eines einzelnen Ereignisses, Grundwahrscheinlichkeit                                                                  |
| $f, FG$                                     | Freiheitsgrade                                                                                                                           |
| $x, y, \chi^2, F, s^2, r$                   | Zufallsvariable werden fett gedruckt, ihre Realisationen durch dieselben normalen Buchstaben charakterisiert                             |
| $u = \frac{y - \mu}{\sigma}$                | Standardisierte Zufallsvariable                                                                                                          |
| $e$                                         | Zufälliger Fehler, Fehlerkomponente in Modellen                                                                                          |
| $n$                                         | Stichprobenumfang, Versuchsumfang                                                                                                        |
| $N$                                         | Umfang einer endlichen Grundgesamtheit, Gesamtumfang mehrerer Stichproben                                                                |
| $\ln$                                       | Natürlicher Logarithmus                                                                                                                  |
| $f(y)$                                      | Dichtefunktion einer kontinuierlichen Zufallsvariablen $y$                                                                               |

|                                                            |                                                                                                                |
|------------------------------------------------------------|----------------------------------------------------------------------------------------------------------------|
| $\Phi(u)$                                                  | Verteilungsfunktion der standardisierten Normalverteilung                                                      |
| $\phi(u)$                                                  | Dichtefunktion der standardisierten Normalverteilung                                                           |
| $N(\mu, \sigma^2)$                                         | Kurzbezeichnung für eine Normalverteilung mit dem Erwartungswert (Mittelwert) $\mu$ und der Varianz $\sigma^2$ |
| $N(0;1)$                                                   | Kurzbezeichnung für die standardisierte Normalverteilung ( $\mu = 0, \sigma^2 = 1$ )                           |
| $u(P)$                                                     | $P$ -Quantil der $N(0;1)$ -Verteilung                                                                          |
| $t(f;P)$                                                   | $P$ -Quantil der $t$ -Verteilung mit $f$ Freiheitsgraden                                                       |
| $\chi^2(f;P)$                                              | $P$ -Quantil der $\chi^2$ -Verteilung mit $f$ Freiheitsgraden                                                  |
| $F(f_1;f_2;P)$                                             | $P$ -Quantil der $F$ -Verteilung mit $f_1$ und $f_2$ Freiheitsgraden                                           |
| $\theta$                                                   | Bezeichnung für einen nicht näher festgelegten Parameter oder den Intraklasskorrelationskoeffizienten          |
| $\hat{\theta}$                                             | Schätzfunktion von (Schätzung von) $\theta$                                                                    |
| $\hat{\theta}$                                             | Schätzwert von $\theta$ (Realisation von $\hat{\theta}$ )                                                      |
| $E(\mathbf{y}) = \mu_y = \mu$                              | Erwartungswert (Mittelwert) der Zufallsvariablen $\mathbf{y}$                                                  |
| $\text{var}(\mathbf{y}) = \sigma_y^2 = \sigma^2$           | Varianz der Zufallsvariablen $\mathbf{y}$                                                                      |
| $\bar{y}_{\cdot} = \bar{y} = \frac{1}{n} \sum_{i=1}^n y_i$ | Arithmetischer Mittelwert der Stichprobenwerte                                                                 |
| $\bar{y}_{\cdot} = \frac{1}{n} \sum_{i=1}^n y_i$           | Arithmetischer Mittelwert der Zufallsvariablen $y_i$ , Schätzfunktion für $\mu$                                |
| $s = \sqrt{s^2}$                                           | Schätzwert von $\sigma = \sqrt{\sigma^2}$                                                                      |
| $\sigma_y = \sigma$                                        | Standardabweichung der Zufallsvariablen $\mathbf{y}$                                                           |
| $s_y = s$                                                  | Schätzwert von $\sigma_y$                                                                                      |
| $\mu_r = E[(\mathbf{y} - \mu)^r]$                          | $r$ -tes zentrales Moment bei eindimensionalen Zufallsvariablen                                                |
| $m_r = \frac{1}{n} \sum_{i=1}^n (y_i - \bar{y}_{\cdot})^r$ | $r$ -tes zentrales Stichprobenmoment, Schätzfunktion von $\mu_r$                                               |
| $\gamma_1 = \frac{\mu_3}{\mu_2^{3/2}}$                     | Schiefte                                                                                                       |
| $g_1 = \frac{m_3}{m_2^{3/2}}$                              | Stichprobenschiefe, Schätzfunktion von $\gamma_1$ , in SPSS, siehe S. 35                                       |

|                                                     |                                                                                                                                          |
|-----------------------------------------------------|------------------------------------------------------------------------------------------------------------------------------------------|
| $\gamma_2 = \frac{\mu_4}{\mu_2^2} - 3$              | Exzess                                                                                                                                   |
| $g_2 = \frac{m_4}{m_2^2} - 3$                       | Stichprobenexzess, Schätzfunktion von $\gamma_2$ , in SPSS, siehe S. 36                                                                  |
| $\text{cov}(\mathbf{x}, \mathbf{y}) = \sigma_{xy}$  | Kovarianz zwischen Zufallsvariablen $\mathbf{x}$ und $\mathbf{y}$                                                                        |
| $s_{xy} = \hat{\text{cov}}(\mathbf{x}, \mathbf{y})$ | Schätzfunktion von $\sigma_{xy}$                                                                                                         |
| $\rho$                                              | Einfacher (Produkt-Moment-)Korrelationskoeffizient                                                                                       |
| $r$                                                 | Einfacher Stichprobenkorrelationskoeffizient, Schätzfunktion von $\rho$                                                                  |
| $\sigma_a^2$                                        | Varianzkomponente des Faktors $A$                                                                                                        |
| $s_a^2, \hat{\sigma}_a^2$                           | Schätzfunktion der Varianzkomponente des Faktors $A$                                                                                     |
| MQF                                                 | Mittlerer quadratischer Fehler $E[(\hat{\theta} - \theta)^2]$                                                                            |
| $\beta_i$                                           | Regressionskoeffizient                                                                                                                   |
| $b_i, \hat{\beta}_i$                                | Stichprobenregressionskoeffizient, Schätzung von $\beta_i$                                                                               |
| $H_0$                                               | Nullhypothese                                                                                                                            |
| $H_A$                                               | Alternativhypothese                                                                                                                      |
| $\alpha$                                            | Risiko 1. Art eines statistischen Tests (Irrtumswahrscheinlichkeit)                                                                      |
| $1 - \alpha$                                        | Konfidenzkoeffizient                                                                                                                     |
| $\beta, \beta^*$                                    | Risiko 2. Art, Risiko bei Selektionsproblemen                                                                                            |
| $\beta^*$                                           | Vorgegebene obere Schranke für $\beta$                                                                                                   |
| $1 - \beta$                                         | Güte eines Tests, Wahrscheinlichkeit der richtigen Auswahl bei Selektionsproblemen                                                       |
| $\delta$                                            | Praktisch interessierende Mindendifferenz bei Tests für Lageparameter, halbe erwartete Breite von Konfidenzintervallen für Lageparameter |
| $(a; b)$                                            | Konfidenzintervall mit den Grenzen $a$ und $b$                                                                                           |
| $(a; b)$                                            | Realisation des Konfidenzintervalles $(a; b)$                                                                                            |
| $A \succ B, B \prec A$                              | Der Faktor $A$ ist dem Faktor $B$ hierarchisch übergeordnet, d.h., $B$ ist $A$ hierarchisch untergeordnet                                |

|              |                                                                                                                  |
|--------------|------------------------------------------------------------------------------------------------------------------|
| $A \times B$ | Die Faktoren $A$ und $B$ sind kreuzklassifiziert                                                                 |
| $SQ_x, SQ$   | Summe der Quadrate der Abweichungen bezüglich der Variablen $x$                                                  |
| $MQ$         | Mittleres Abweichungsquadrat                                                                                     |
| $E(MQ)$      | Erwartungswert der $MQ$                                                                                          |
| BUB          | Balancierte unvollständige Blockanlage                                                                           |
| TBUB         | Teilweise balancierte unvollständige Blockanlage                                                                 |
| $CEIL(x)$    | Rundungsoperator, ist $x$ ganzzahlig, ergibt sich $x$ , sonst wird $CEIL(x)$ zum ganzzahligen Anteil von $x + 1$ |

## Übungsaufgaben

### Aufgabe 1

Formulieren Sie eine Aufgabenstellung aus Ihrer Studienrichtung und diskutieren Sie die Schritte (i) bis (iv) und den Plan für (vi)!

### Aufgabe 2

Ist eine BUB eine zusammenhängende Blockanlage?

### Aufgabe 3

Wieviele Lottoscheine muss man mindestens ausfüllen, um evtl. mit Sicherheit bei jeder denkbaren Ziehung einen Zweier zu haben? Hier steht evtl., da die Existenz nicht gesichert sein muss.

### Aufgabe 4

Konstruieren Sie einen faktoriellen Versuchsplan mit 5 Faktoren mit je 2 Stufen!

### Aufgabe 5

Berechnen Sie Mittelwerte, Varianzen, Schiefen und Exzesse der beiden Datenreihen der Tabelle 3.1.

**Tabelle 3.1** Die Wurfgewichte von Labormäusen (in g).

| $i$ | $x_i$ | $y_i$ |
|-----|-------|-------|
| 1   | 7,6   | 7,8   |
| 2   | 13,2  | 11,1  |
| 3   | 9,1   | 16,4  |
| 4   | 10,6  | 13,7  |
| 5   | 8,7   | 10,7  |
| 6   | 10,6  | 12,3  |
| 7   | 6,8   | 14,0  |
| 8   | 9,9   | 11,9  |
| 9   | 7,3   | 8,8   |
| 10  | 10,4  | 7,7   |
| 11  | 13,3  | 8,9   |
| 12  | 10,0  | 16,4  |
| 13  | 9,5   | 10,2  |

### Aufgabe 6

Leiten Sie aus der Genauigkeitsforderung für Konfidenzintervalle die Bedingung für  $n$  ab

$$E(H) = H = u \left( 1 - \frac{\alpha}{2} \right) \frac{\sigma}{\sqrt{n}} \leq \delta \Rightarrow n = \text{CEIL} \left\{ u^2 \left( 1 - \frac{\alpha}{2} \right) \frac{\sigma^2}{\delta^2} \right\}$$

### Aufgabe 7

Berechnen Sie die 0,99 – Konfidenzintervalle für die Grundgesamtheiten der beiden Messreihen in Tabelle 3.1!

### Aufgabe 8

Berechnen Sie die Stichprobenumfänge für eine Intervallschätzung bei folgenden Genauigkeitsvorgaben.

**Tabelle Ü1** Stichprobenumfang  $n$  für einige  $\alpha$  und  $c$ .

| $d = c \cdot \sigma$ | $\frac{1}{2,5} \sigma$ | $\frac{1}{3} \sigma$ | $\frac{1}{4,5} \sigma$ | $\frac{1}{8} \sigma$ |
|----------------------|------------------------|----------------------|------------------------|----------------------|
| $\alpha = 0,02$      |                        |                      |                        |                      |
| $\alpha = 0,05$      |                        |                      |                        |                      |
| $\alpha = 0,08$      |                        |                      |                        |                      |

### Aufgabe 9

Berechnen Sie die Stichprobenumfänge in Tabelle Ü2 für eine Intervallschätzung der Differenz der Erwartungswerte bei gepaarten Beobachtungen aus den Differenzen der Werte der Tabelle 3.1

**Tabelle Ü2** Stichprobenumfang  $n$  für einige  $\alpha$  und  $c$ .

| $d = c \cdot \sigma$ | $\frac{1}{2} \sigma$ | $\frac{1}{3} \sigma$ | $\frac{1}{4} \sigma$ | $\frac{1}{8} \sigma$ |
|----------------------|----------------------|----------------------|----------------------|----------------------|
| $\alpha = 0,01$      |                      |                      |                      |                      |
| $\alpha = 0,05$      |                      |                      |                      |                      |
| $\alpha = 0,1$       |                      |                      |                      |                      |

### Aufgabe 10

Berechnen Sie das 0,99 – Konfidenzintervall bei gepaarten Beobachtungen (Interpretation 1) für die Erwartungswertdifferenz der beiden Messreihen in Tabelle 3.1!

### Aufgabe 11

Berechnen Sie das 0,99 – Konfidenzintervall bei unabhängigen Stichproben (Interpretation 2) für die Erwartungswertdifferenz der beiden Messreihen in Tabelle 3.1! Vergleichen Sie die Ergebnisse der Aufgaben 10 und 11. Was fällt Ihnen auf?
